# Supplementary material for: Dispersibility of different sized graphene oxide sheets and their reinforcement on polyamide 6 fibers
Source: Royal Society of Chemistry journal article supplement (doi:10.1039/c7ra12261f), 2017-01-01
Supplement: c7ra12261f1.pdf [file c7ra12261f1.pdf]

## Electronic Supplementary Information (ESI)

# **Dispersibility of Different Sized Graphene Oxide Sheets and Their Reinforcement on Polyamide 6 Fibers**

Shiyu Zhang, Yao Cheng, Weijuan Xu, Juan Li, Jun Sun, Jianjun Wang, Chuanxiang Qin and Lixing Dai\*

College of Chemistry, Chemical Engineering and Materials Science, Soochow University, Suzhou, Jiangsu, 215123, People's Republic of China.

\*Corresponding author. E-mail: [dailixing@suda.edu.cn](mailto:dailixing@suda.edu.cn) (L. Dai); Fax: +86-0512-65883354; Tel: +86-0512-65883354.

### Table of contents:

1. Supplementary Calculation
2. Supplementary Synthetic Method
3. Supplementary Table (Table S1)
4. Supplementary Figures (Fig. S1–S8)

#### 1. Supplementary Calculation

Size polydispersity (SPD) of GO sheet was calculated according to Equation (1).

$$SPD = \frac{STD}{\mu} \quad (1)$$

$$STD = \sqrt{\frac{\sum_{i=1}^N (X_i - \mu)^2}{N}} \quad (2)$$

Note: STD represents Standard Deviation of GO sheet size based on SEM images calculated according to Equation (2);  $\mu$  is the mean size of GO sheets in the SEM images;  $X_i$  is the size of one GO sheet in the SEM images; N is the total number of GO sheets in the SEM images.

## 2. Supplementary Synthetic Method

$\text{Fe}_3\text{O}_4$  nanocrystallines anchored on GO sheets were synthesized by a simple hydrothermal method.<sup>1</sup> In this synthesis process, 100 mg GO was dispersed in 100 mL deionized water with sonication. Then, 10 mmol ferric citrate was added into the solution and stirred at 80 °C for 1 h to make sure of a complete combination of the metal ion and the oxygen-containing functional groups on the edges and surface of GO sheets. The resulting solution was transferred to a Teflon-line stainless steel autoclave (250 mL in volume) and heated at 90 °C for 12 h. After cooling down to room temperature, the product was centrifuged and washed several times by alcohol and deionized water before vacuum freeze-drying. Finally,  $\text{Fe}_3\text{O}_4$  nanocrystallines growing uniformly on GO surface were obtained.

## 3. Supplementary Table

Table S1. The details of mechanical properties in PA6, CPA0.2, LPA0.2, MPA0.2 and SPA0.2 fibers.

| Sample | Young's Modulus<br>(MPa) | Yield Stress<br>(MPa) | Tensile Strength<br>(MPa) | Extensibility<br>(%) | Toughness<br>(MJ m <sup>-3</sup> ) |
|--------|--------------------------|-----------------------|---------------------------|----------------------|------------------------------------|
| CPA0.2 | 280.6                    | 32.9                  | 158.1                     | 292.1                | 236.2                              |
| LPA0.2 | 383.5                    | 58.5                  | 205.8                     | 309.5                | 345.8                              |
| MPA0.2 | 679.1                    | 70.5                  | 322.3                     | 348.2                | 544.2                              |

SPA0.2

1048.2

96.1

423.1

364.4

771.9

#### 4. Supplementary Figures

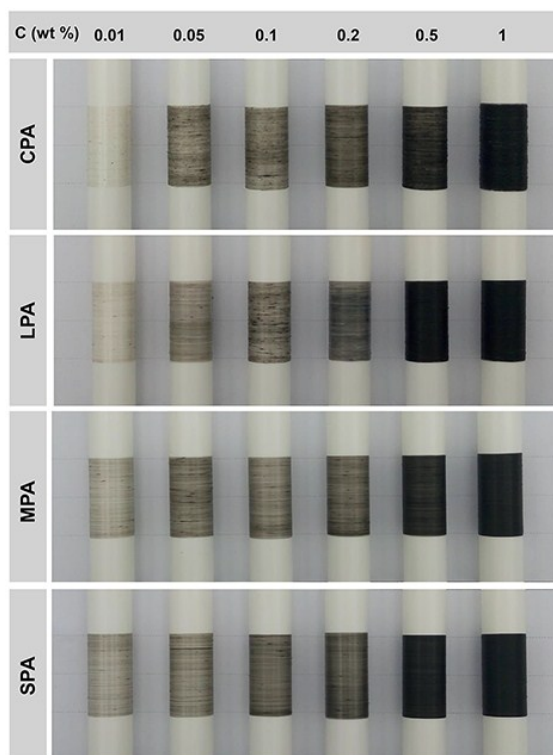

**Fig. S1.** PA6/g-GO nanocomposite fibers containing CGO, LGO, MGO and SGO sheets at different loadings continuously melt-spun and collected on spools.

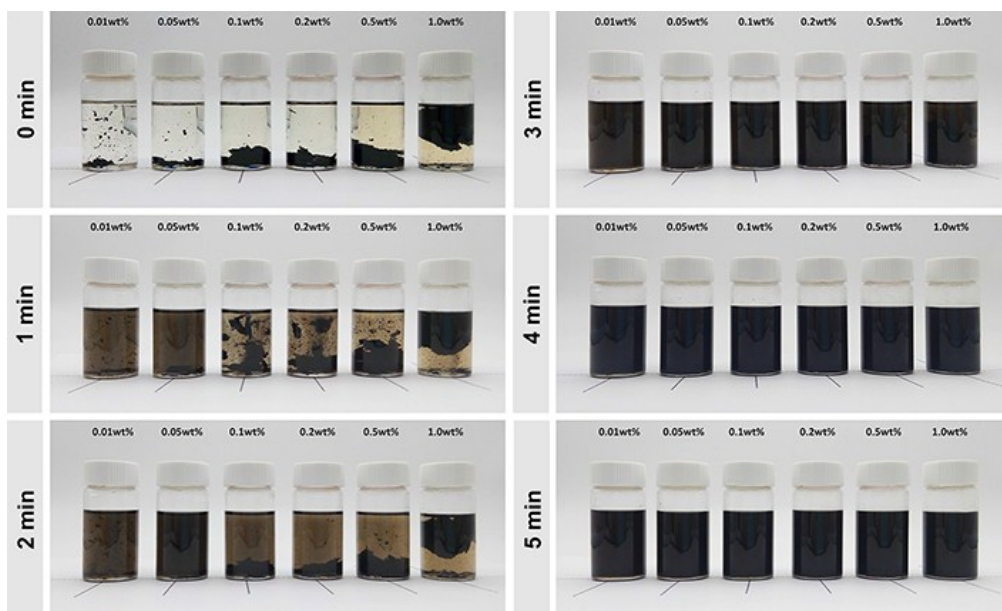

**Fig. S2.** Digital photographs of SGO sheets in CPL melt at different loadings at 90 °C for various sonication time: 0 min, 1 min, 2 min, 3min, 4 min and 5 min.

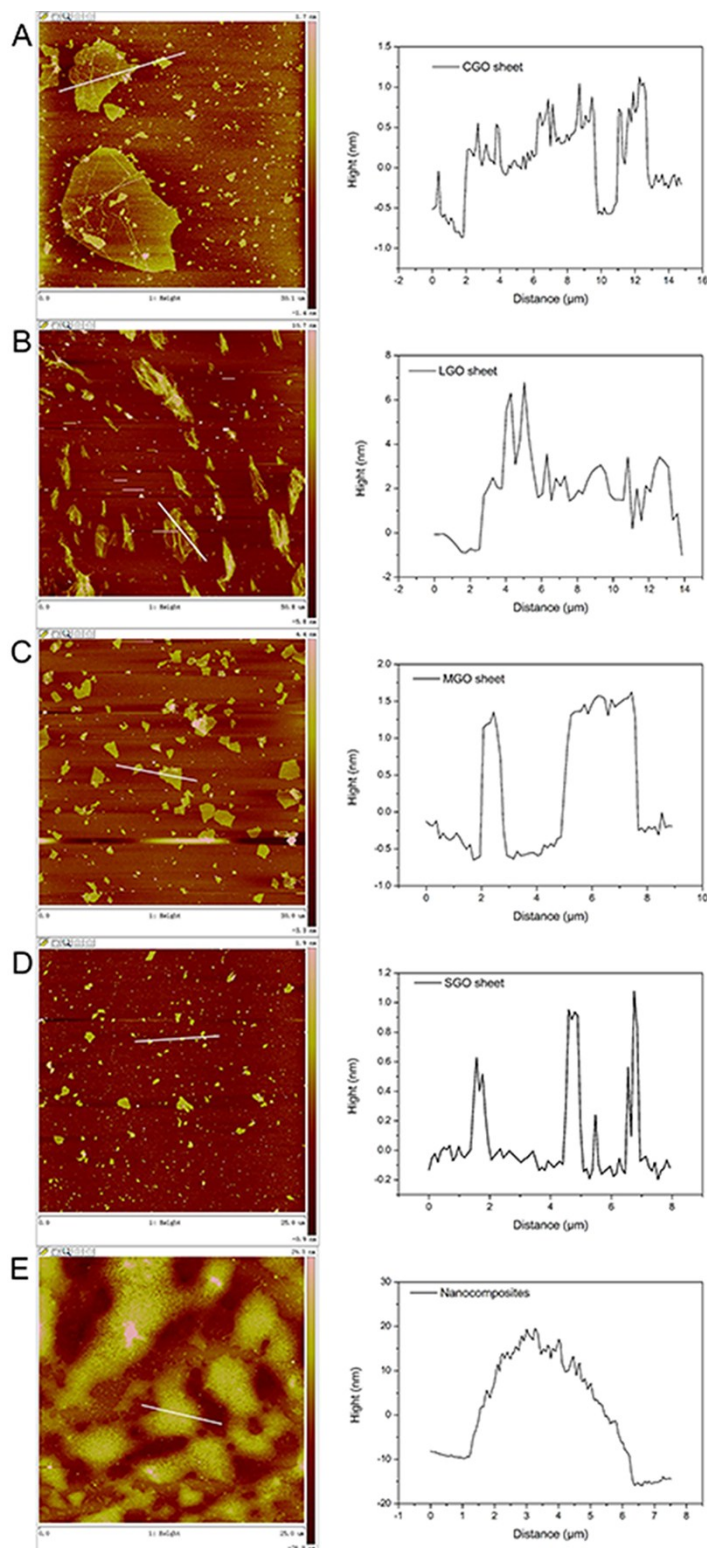

**Fig. S3.** Typical AFM images of (A) CGO, (B) LGO, (C) MGO, (D) SGO, (E) g-MGO specimens. The thickness of different sized GO sheets is about 1 nm, suggesting effective size fractionation of different sized GO sheet with Single-layer or few layer structure, while the thickness of g-MGO sheets increases to about 25 nm, suggesting PA6 chains have obviously combined with g-GO.

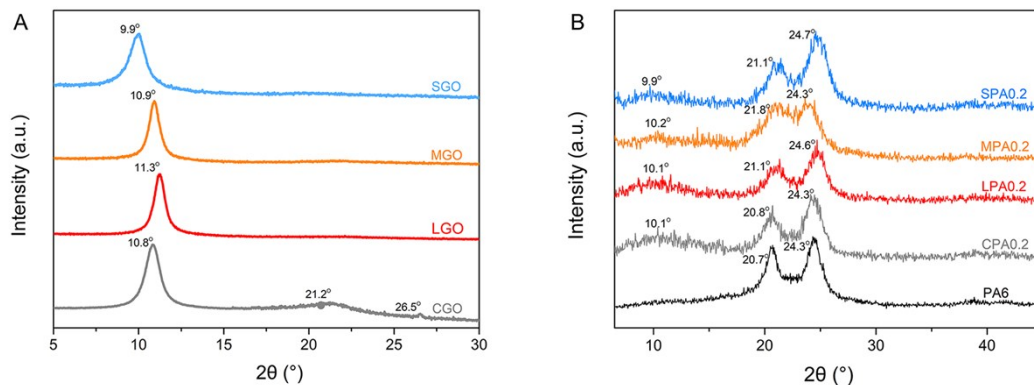

**Fig. S4.** (A) XRD patterns of CGO, LGO, MGO and SGO specimens; (B) XRD patterns of PA6, CPA0.2, LPA0.2, MPA0.2 and SPA0.2 nanocomposites.

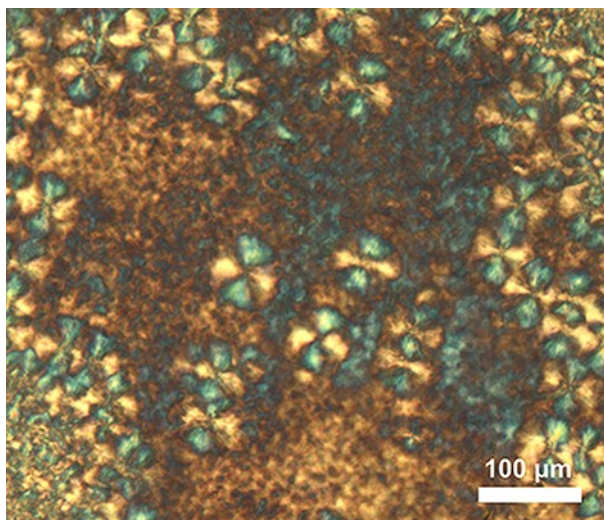

**Fig. S5.** Representative polarized optical image of PA6. It is shown obvious cross extinction phenomenon in pure PA6 matrix.

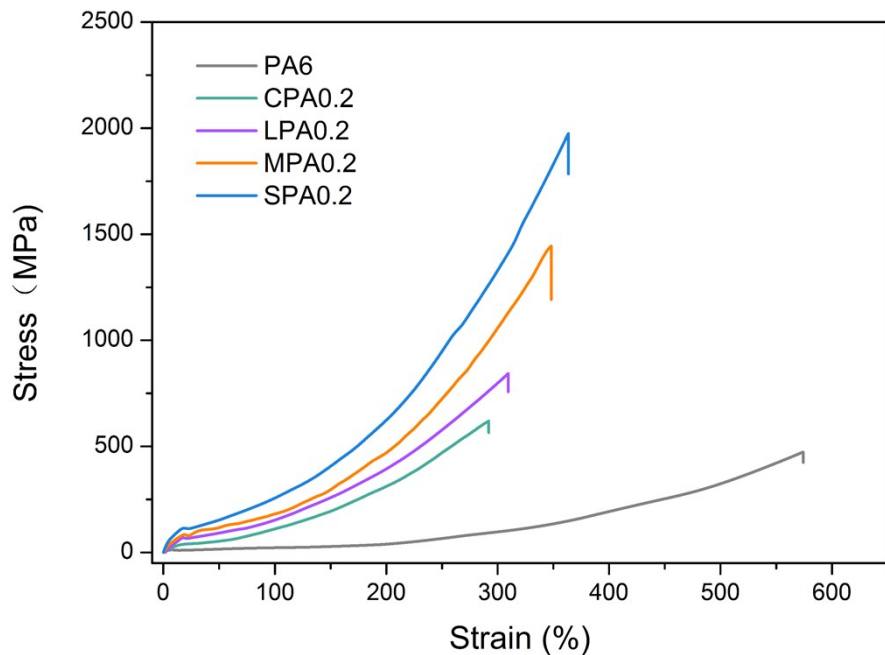

**Fig. S6.** True stress-strain curves for the nanocomposite fibers containing different sized GO at the same loading (0.2 wt%). The true stress-strain curves are obtained from the calculated results according to the literature<sup>2</sup> based on Figure 7A, which is used to verify true mechanical properties with the change of fiber linear density during the measurement.

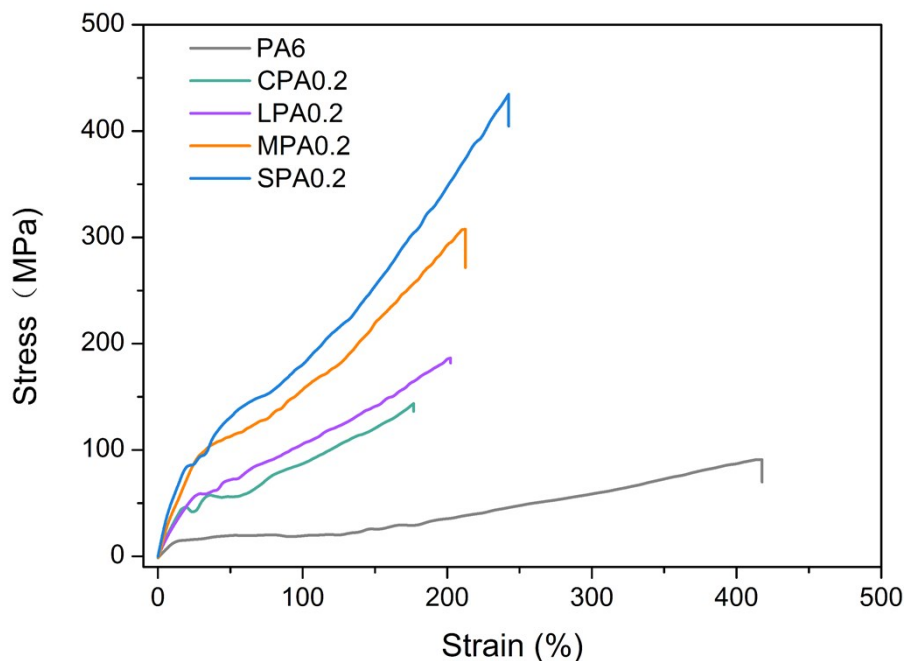

**Fig.S7.** Knot stress-strain curves for the nanocomposite fibers containing different sized GO at the same loading (0.2 wt%). Knot stress-strain curve is measured using a sample fiber with a knot, which is used to verify mechanical properties of the fiber under shear stress.

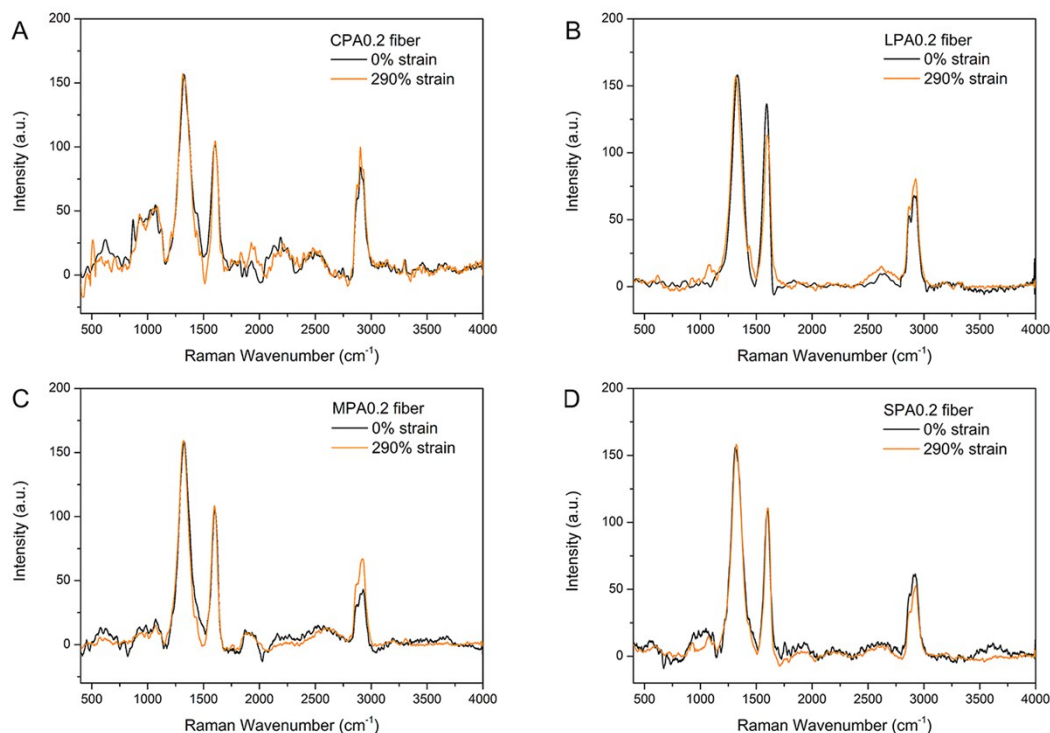

**Fig.S8.** The full range (4000-400 cm<sup>-1</sup>) of Raman spectra of prepared samples for (A) CPA0.2, (B) LPA0.2, (C) MPA0.2 and (D) SPA0.2 nanocomposite fibers.

## References

1. Y. C. Dong, R. G. Ma, M. Jun Hu, H. Cheng, C. K. Tsang, Q. D. Yang, Y. Yang Li and J. A. Zapien, *Journal of Solid State Chemistry*, 2013, **201**, 330-337.
2. I. Faridmehr, M. Hanim Osman, A. Bin Adnan, A. Farokhi Nejad, R. Hodjati and M. Amin Azimi, *American Journal of Civil Engineering and Architecture*, 2014, **2**, 53-59.
